# Supplementary material for: One-dimensional coordination polymers of a flexible bis(pyridylurea) ligand
Source: Royal Society of Chemistry journal article supplement (doi:10.1039/c1ce05662j), 2011-01-01
Supplement: c1ce05662j.pdf [file c1ce05662j.pdf]

Electronic Supplementary Information (ESI)

## One-dimensional coordination polymers of a flexible bis(pyridylurea) ligand

Yongjing Hao,<sup>ac</sup> Biao Wu,<sup>\*ab</sup> Shaoguang Li,<sup>ac</sup> Bin Liu,<sup>b</sup> Chuandong Jia,<sup>ac</sup> Xiaojuan Huang<sup>a</sup> and Xiao-Juan Yang<sup>a</sup>

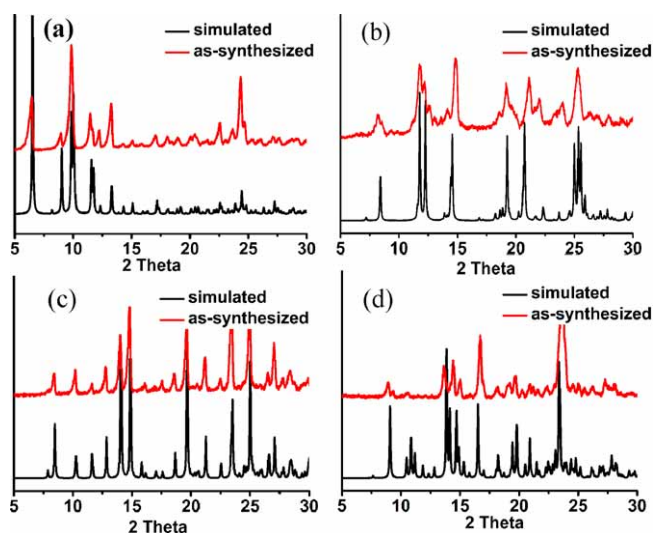

**Fig. S1** Powder X-ray diffraction patterns of the compounds: as-synthesized (red) and simulated from the single-crystal diffraction data (black): (a) **1**; (b) **2**; (c) **3**; (d) **4**.
